# Supplementary material
Source: PubMed Central journal article supplement (PMC2898589)
Supplement: JCI41192sd.pdf [file JCI41192sd.pdf]

**Supplemental Table 1.** *Statistical evaluation (p-values) of rhythmicity of clock gene expression in neuronal and non-neuronal tissues during jet lag.*

Rhythmic clock gene expression profiles in the SCN, the somatosensory cortex, the adrenal, the kidney, the liver and the pancreas were evaluated by sine wave curve fitting using the CircWave Batch Software (CircWave Batch V3.3;  $\alpha = 0.05$ ,  $\beta = 24$ ; Oster et al. 2006). Significance of rhythmicity is indicated by p-values before (day 0) and after 6 h shift of the photoperiod (days 2, 3, 4 and 8 or 12; see Methods for details).

| tissue                           | Per1    | Per2    | Dbp     | Bmal1   | Rev-Erba | day   |
|----------------------------------|---------|---------|---------|---------|----------|-------|
| SCN<br>(ISH)                     | <0.0001 | <0.0001 | <0.0001 | 0.0006  | <0.0001  | day0  |
|                                  | <0.0001 | 0.0004  |         |         |          | day2  |
|                                  | 0.0003  | 0.0430  | <0.0001 | 0.0067  | 0.0032   | day3  |
|                                  | 0.0009  | 0.0007  | 0.0035  | <0.0001 | 0.0015   | day4  |
|                                  | 0.0021  | <0.0001 | <0.0001 | 0.0002  | 0.0025   | day12 |
| Somatosensory<br>Cortex<br>(ISH) | 0.0001  | 0.0316  | 0.0023  | 0.0229  | 0.0485   | day0  |
|                                  |         |         |         |         |          | day2  |
|                                  | <0.0001 | 0.0013  | 0.0001  | 0.0100  | 0.0010   | day3  |
|                                  | 0.0039  | 0.0001  | 0.0006  | 0.0035  | 0.0030   | day4  |
|                                  | 0.0096  | 0.0006  | 0.0305  | 0.0481  | 0.0498   | day12 |
| Adrenal<br>(qPCR)                | 0.0343  | 0.0003  | <0.0001 | 0.0001  | <0.0001  | day0  |
|                                  | 0.0001  | <0.0001 | 0.0004  | <0.0001 | 0.0002   | day2  |
|                                  | 0.0233  | 0.0042  | 0.0089  | <0.0001 | 0.0034   | day3  |
|                                  | 0.0424  | <0.0001 | 0.0077  | 0.0001  | 0.0021   | day4  |
|                                  | 0.0020  | 0.0005  | 0.0012  | <0.0001 | 0.0001   | day8  |
| Kidney<br>(qPCR)                 | 0.0210  | 0.0021  | 0.0014  | <0.0001 | <0.0001  | day0  |
|                                  | 0.0160  | <0.0001 | 0.0025  | <0.0001 | 0.0004   | day2  |
|                                  | 0.0125  | 0.0030  | 0.0028  | <0.0001 | 0.0002   | day3  |
|                                  | 0.0004  | 0.0123  | 0.0013  | 0.0010  | 0.0037   | day4  |
|                                  | 0.0063  | 0.0413  | 0.0033  | <0.0001 | 0.0014   | day8  |
| Liver<br>(qPCR)                  | 0.0030  | 0.0181  | 0.0088  | <0.0001 | 0.0003   | day0  |
|                                  | 0.0001  | 0.0013  | 0.0075  | 0.0001  | 0.0028   | day2  |
|                                  | 0.0029  | 0.0002  | 0.0118  | 0.0035  | 0.0053   | day3  |
|                                  | 0.0359  | 0.0386  | 0.0440  | 0.0213  | 0.0015   | day4  |
|                                  | 0.0008  | 0.0214  | 0.0044  | <0.0001 | 0.0007   | day8  |
| Pankreas<br>(qPCR)               | 0.0324  | 0.0082  | 0.0199  | 0.0114  | 0.0001   | day0  |
|                                  | 0.0341  | 0.0019  | 0.0272  | 0.0028  | 0.0454   | day2  |
|                                  | 0.0244  | 0.0406  | 0.0063  | 0.0018  | 0.0164   | day4  |
|                                  | 0.0096  | 0.0185  | 0.0041  | 0.0292  | 0.0039   | day8  |

**Supplemental Table 2.** Results of a *statistical analysis of PS<sub>50</sub> values.*

Differences between the rate of gene expression adjustments to a 6 h phase advance in the different tissues examined were analyzed using F-test evaluation using the GraphPad software. Significance of rhythmicity is indicated by p-values and the corresponding F-values. (see Methods for details).

| Tissue                            | Reference gene    | Statistical value | Gene          |               |               |              |                 |
|-----------------------------------|-------------------|-------------------|---------------|---------------|---------------|--------------|-----------------|
|                                   |                   |                   | <i>Per1</i>   | <i>Per2</i>   | <i>Dbp</i>    | <i>Bmal1</i> | <i>Rev-Erba</i> |
| SCN<br>Figure 2C                  | <i>Per1</i>       | p-value           | -             | 0.7367        | <0.0001       | 0.0003       | 0.0052          |
|                                   |                   | F-value           | -             | 0.1155 [1,26] | 23.03 [1,23]  | 17.76 [1,23] | 9.541 [1,23]    |
|                                   | <i>Per2</i>       | p-value           | 0.7367        | -             | <0.0001       | <0.0001      | 0,0001          |
|                                   |                   | F-value           | 0.1155 [1,26] | -             | 29.23 [1,23]  | 29.32 [1,23] | 21.28 [1,23]    |
| Liver                             | <i>(Activity)</i> | p-value           | <0.0001       | <0.0001       | 0.3222        | 0.4494       | 0.9129          |
|                                   |                   | F-value           | 23.43 [1,173] | 37.65 [1,173] | 0.98 [1,170]  | 0.57 [1,170] | 0.01 [1,170]    |
| Somatosensory cortex<br>Figure 3A | <i>Per2</i>       | p-value           | 0.5724        | -             | 0.007         | 0.004        | 0.032           |
|                                   |                   | F-value           | 0.33 [1,20]   | -             | 8.92 [1,20]   | 10.61 [1,20] | 5.29 [1,20]     |
| Adrenal<br>Figure 3B              | <i>Per2</i>       | p-value           | 0.313         | -             | 0.042         | 0.037        | 0,0001          |
|                                   |                   | F-value           | 1.05 [1,26]   | -             | 4.58 [1,26]   | 4.84 [1,26]  | 5.29 [1,20]     |
| Kidney<br>Figure 3C               | <i>Per2</i>       | p-value           | 0.292         | -             | 0.306         | 0.007        | 0.249           |
|                                   |                   | F-value           | 1.15 [1,26]   | -             | 1.08 [1,26]   | 8.34 [1,26]  | 1.38 [1,26]     |
| Liver<br>Figure 3D                | <i>Per2</i>       | p-value           | 0.048         | -             | 0.015         | <0.0001      | 0.1231          |
|                                   |                   | F-value           | 4.27 [1,26]   | -             | 6.82 [1,26]   | 38.28 [1,26] | 2.54 [1,26]     |
| Pancreas<br>Figure 3E             | <i>Per2</i>       | p-value           | 0.941         | -             | 0.976         | 0.515        | 0.029           |
|                                   |                   | F-value           | 0.006 [1,20]  | -             | 0.0009 [1,20] | 0.44 [1,20]  | 5.50 [1,20]     |
|                                   | <i>Rev-Erba</i>   | p-value           | 0.067         | 0.029         | 0.041         | 0.364        | -               |
|                                   |                   | F-value           | 3.70 [1,20]   | 5.50 [1,20]   | 4.71 [1,20]   | 0.86 [1,20]  | -               |

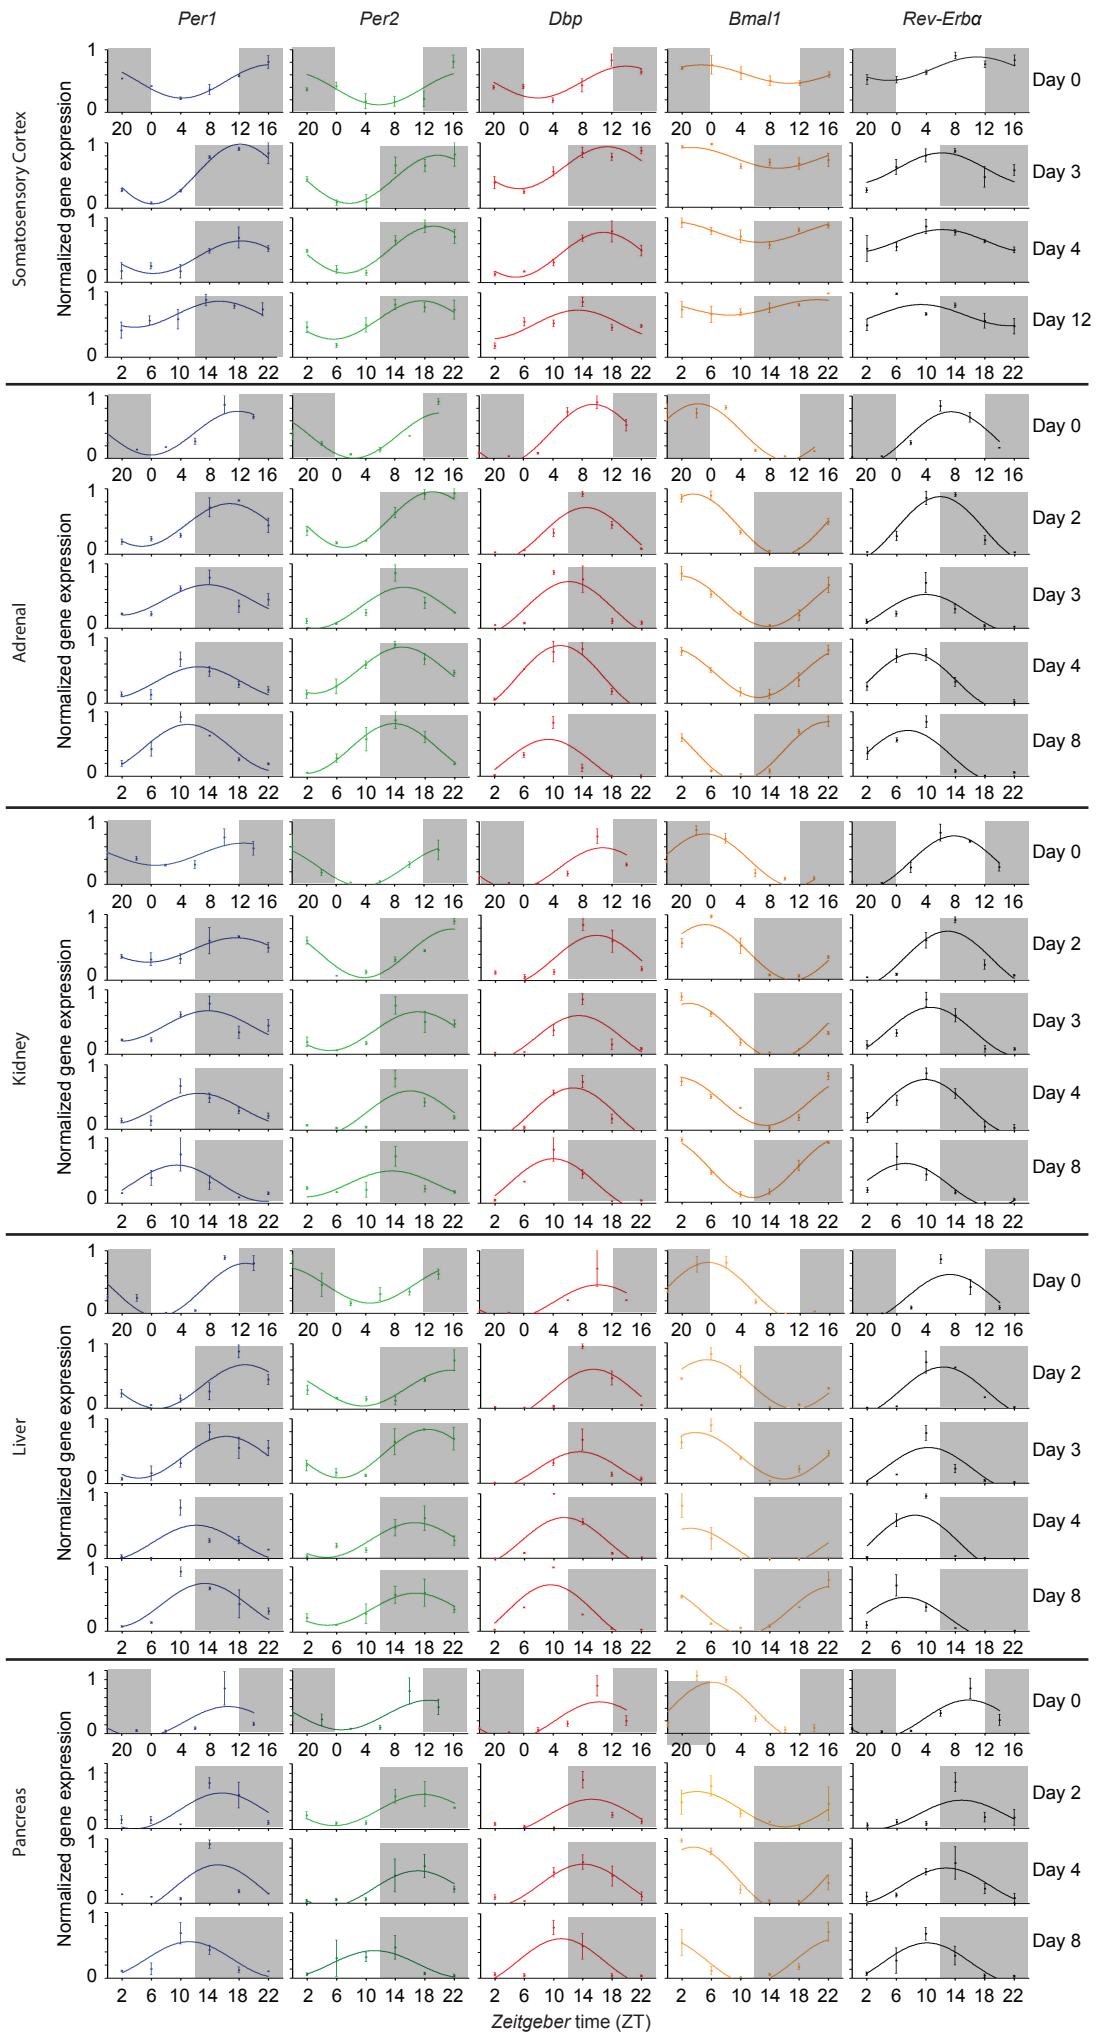

**Supplemental Figure 1.** *Resetting of clock genes during jet lag in peripheral oscillators.*

Shown are diurnal mRNA profiles of different clock genes (3 animals per timepoint; average  $\pm$  SEM) at days 0, 2, 3, 4 and 8 or 12 after the LD shift. Experimental data were fitted with sine waves. Light and dark phases are marked by white and grey shading. *Zeitgeber* times are indicated on the abscissa of days 0, 8 or 12.

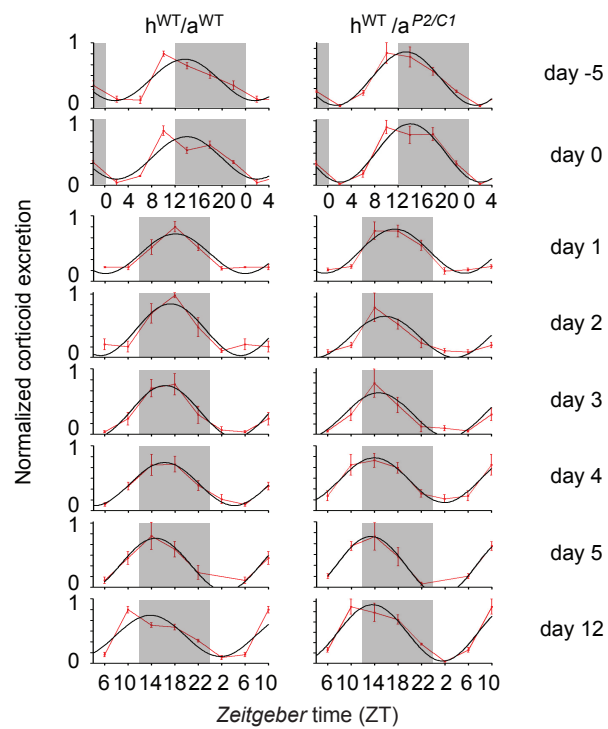

**Supplemental Figure 2.** Adrenal control of resetting of corticosterone excretion during jet lag.

Diurnal normalized corticosterone profiles of sham-operated mice (host<sup>WT</sup>/adrenal<sup>WT</sup> [h<sup>WT</sup>/a<sup>WT</sup>]) and wild-type mice harboring *Per2/Cry1* mutant adrenals (host<sup>WT</sup>/adrenal<sup>Per2/Cry1</sup> [h<sup>WT</sup>/a<sup>P2/C1</sup>]) (5 animals per time point; average  $\pm$  SEM) at day -5, 0, 5 and 12 after the LD shift and the sine wave fits (black). Light and dark phases are marked in white and grey shadings. *Zeitgeber* times are indicated at the bottom of day 0 and 12.
